# Supplementary material
Source: PubMed Central journal article supplement (PMC7528220)
Supplement: NIHMS1613022-supplement-1613022_Supp_info.pdf [file NIHMS1613022-supplement-1613022_Supp_info.pdf]

# Supplementary Figure 1

a

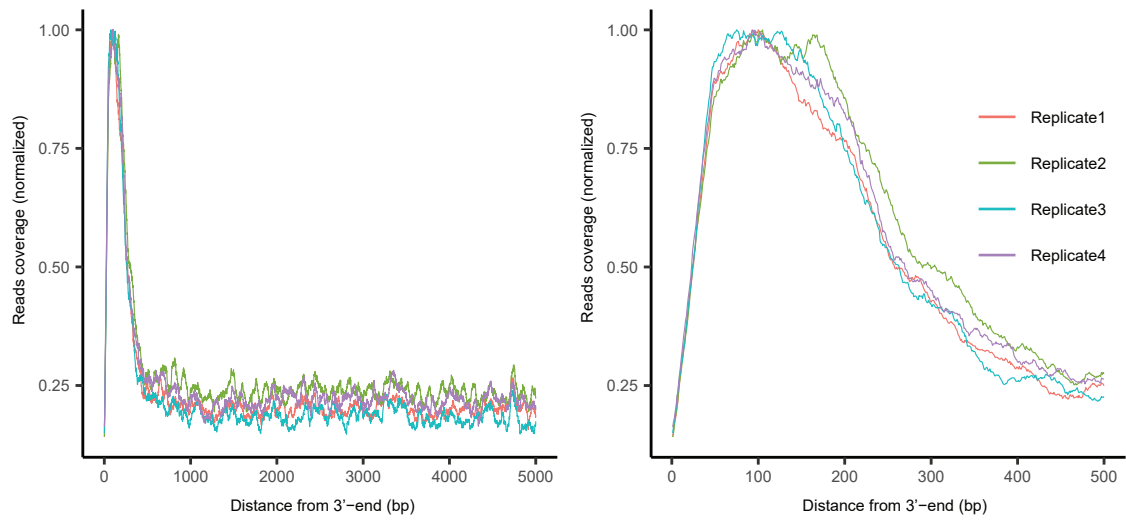

b

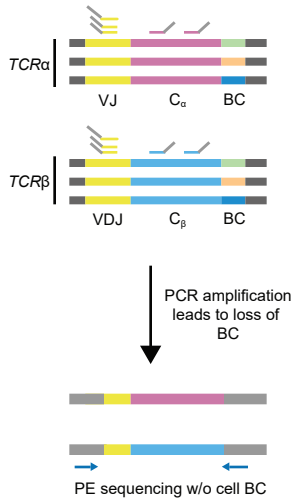

c

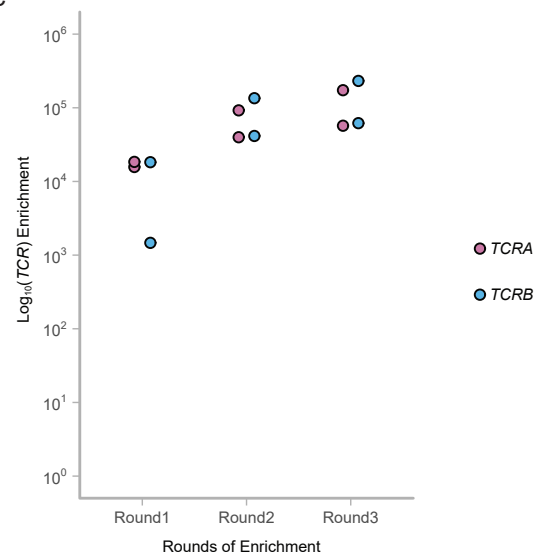

d

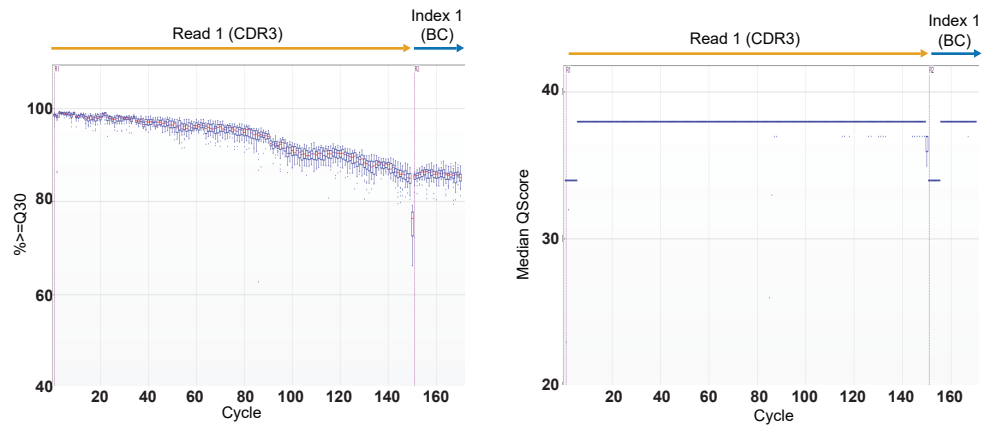

**Supplementary Fig. 1** **a**, Average insert size of 3' sequencing libraries. Results of scRNA-Seq of OT-I spiked-in libraries were analyzed for insert size. Genes with ENSEMBL defined 3' end were used, and insert size is shown as distance from the defined 3' end for up to 5kbp (left), or 500bp (right). Reads coverage normalized by maximum of each replicate is shown to aid comparison across samples. **b**, Schematic of application of conventional *CDR3* amplification to 3' barcoded libraries. The use of primers specific to the constant regions results in efficient amplification of the *TCR CDR3* region but leads to loss of single-cell barcodes. **c**, qPCR assessment of *TCR* transcript enrichment by affinity pull-down. Successive rounds of affinity pull-down on whole transcriptome libraries from T cells are shown. See **Methods** for more details. Data represent two independent experiments for each set of enrichment. **d**, Examples of quality score plots from sequencing of *TCR* enriched libraries. A total of 170 cycles were used to sequence the *CDR3* (1-150) and cellular barcode (151-170). (left) Cumulative percentages of reads with overall QScore  $\geq 30$  by cycle number. (right) Median QScore of each cycle.



**Supplementary Fig. 2 | a**, Total *TCR* recovery across four OT-I Spiked-in libraries (n = 4 samples). (left) Overall *CDR3* recovery rates for all cells. (right) *CDR3* recovery rates after removing cells without mapped *TCR* transcripts in whole transcriptome data. Box and whisker plots indicate the (box) 25<sup>th</sup> and 75<sup>th</sup> percentile along with (whisker)  $\pm 1.5 \times$  interquartile range. **b**, (left) *CDR3* recovery mapped on tSNE visualization of whole transcriptomes, and (right) key cell type surface markers (n = 6,620 cells). (right) Color indicates log-normalized gene expression (yellow to red). T cells were marked by expression of *Cd3e*, *Trac* and *Trbc*. Small numbers of other cell types were present due to incomplete magnetic enrichment. These included B cells (*Igkc*), macrophages (*Mpeg1*), and myeloid cells (*Cd74*). A small number of *TCR* sequences was also recovered from these clusters, correlating with trace amount of *Cd3e* expression in these clusters. These clusters were removed in subsequent analysis. **c**, Ratios of most frequent V,J, and *CDR3* call for each UMI relative to either the second most frequent call (for V and J segments, resulting in “consensus frequency” between 0.5-1) or to the total number of reads (for *CDR3*, resulting in consensus frequency between 0-1). See **Methods** for more details.



# Supplementary Figure 3

a

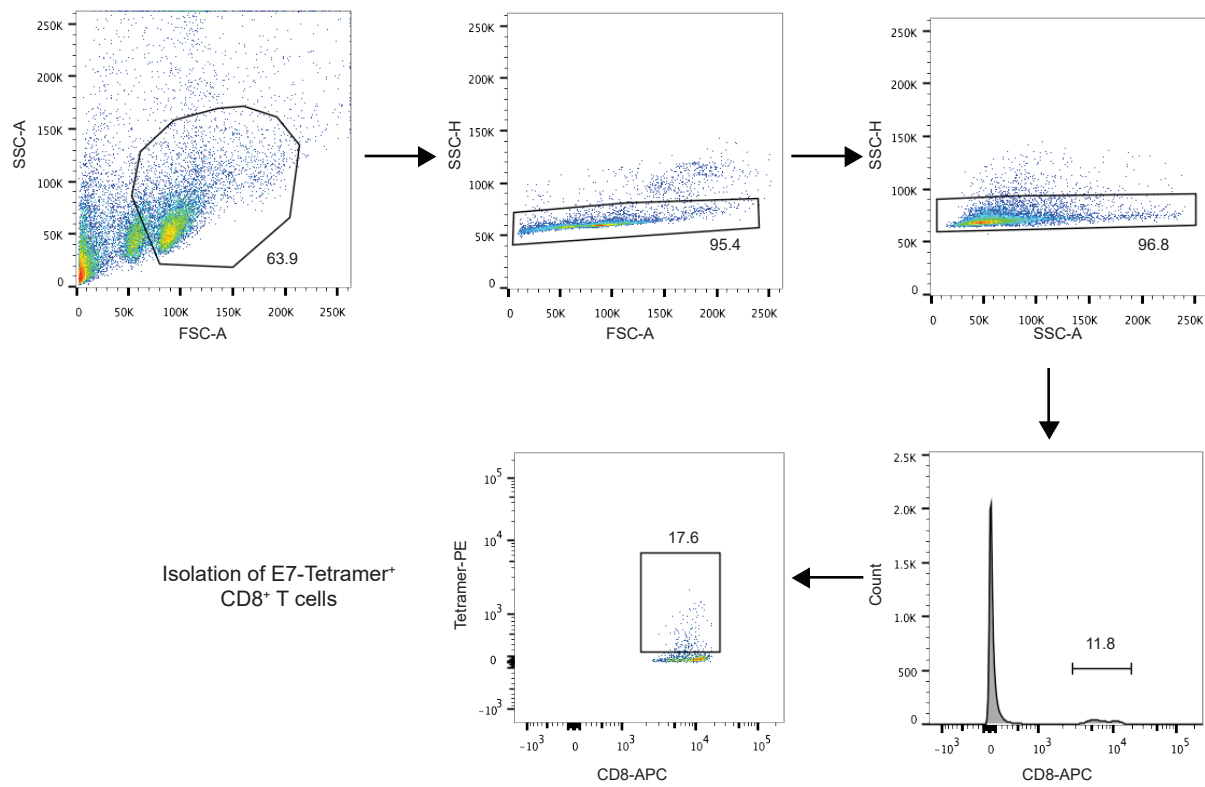

b

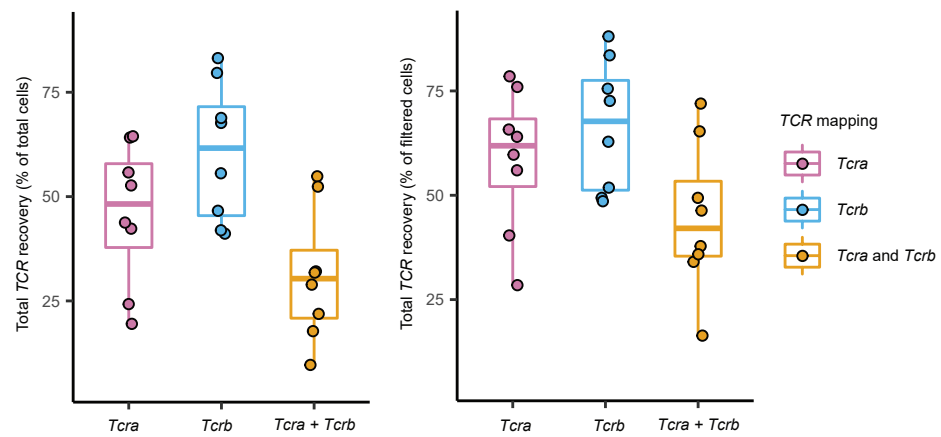

# Supplementary Figure 3

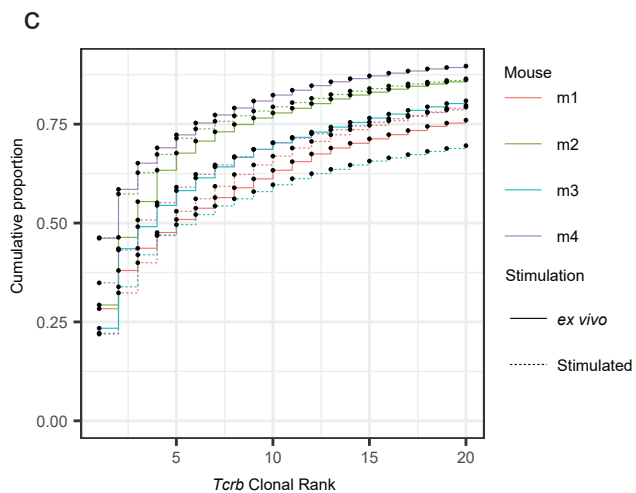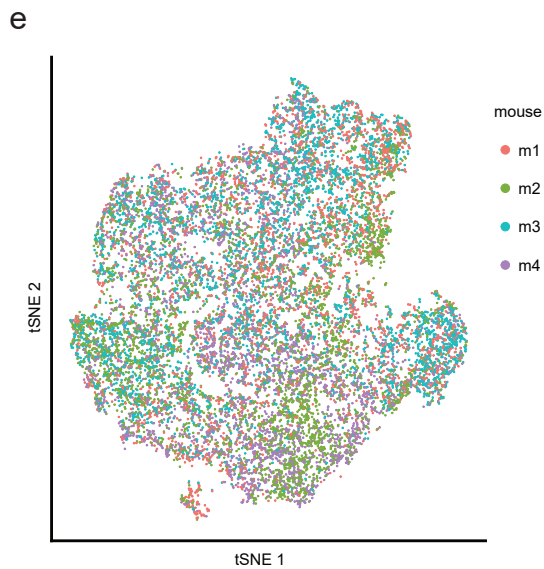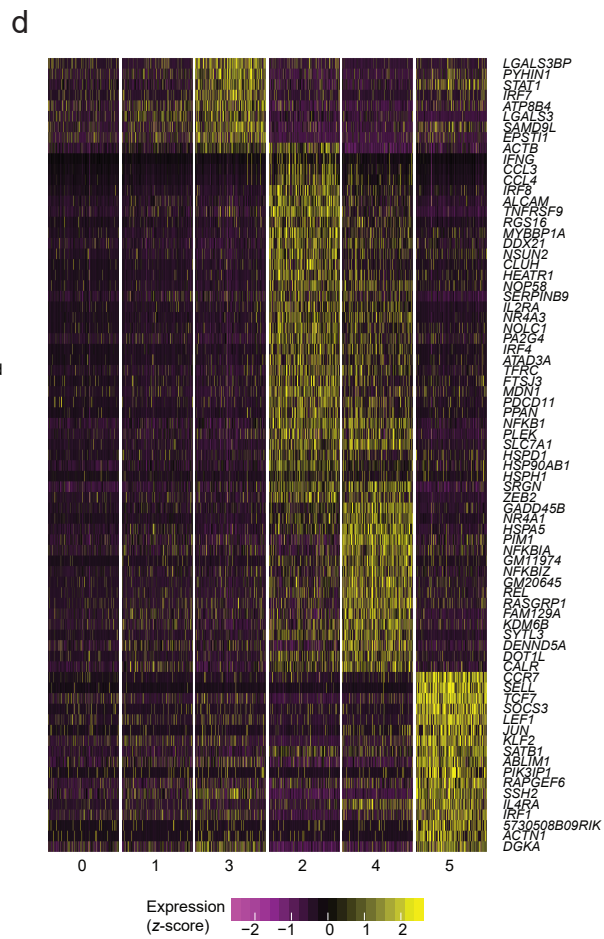

Supplementary Figure 3

f

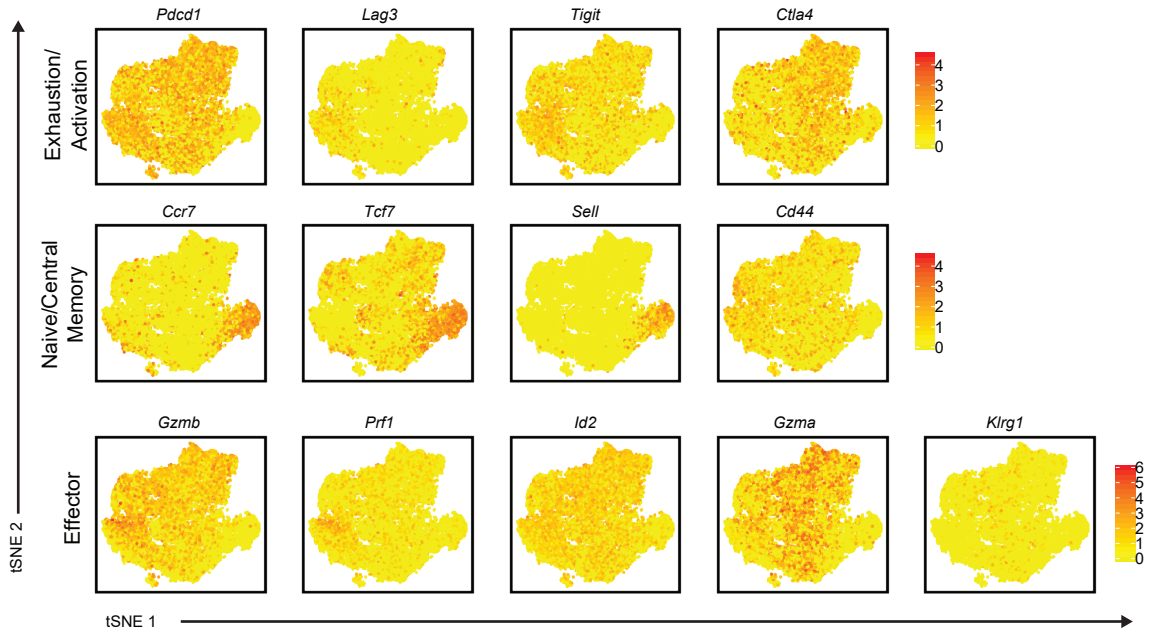

# Supplementary Figure 3

g

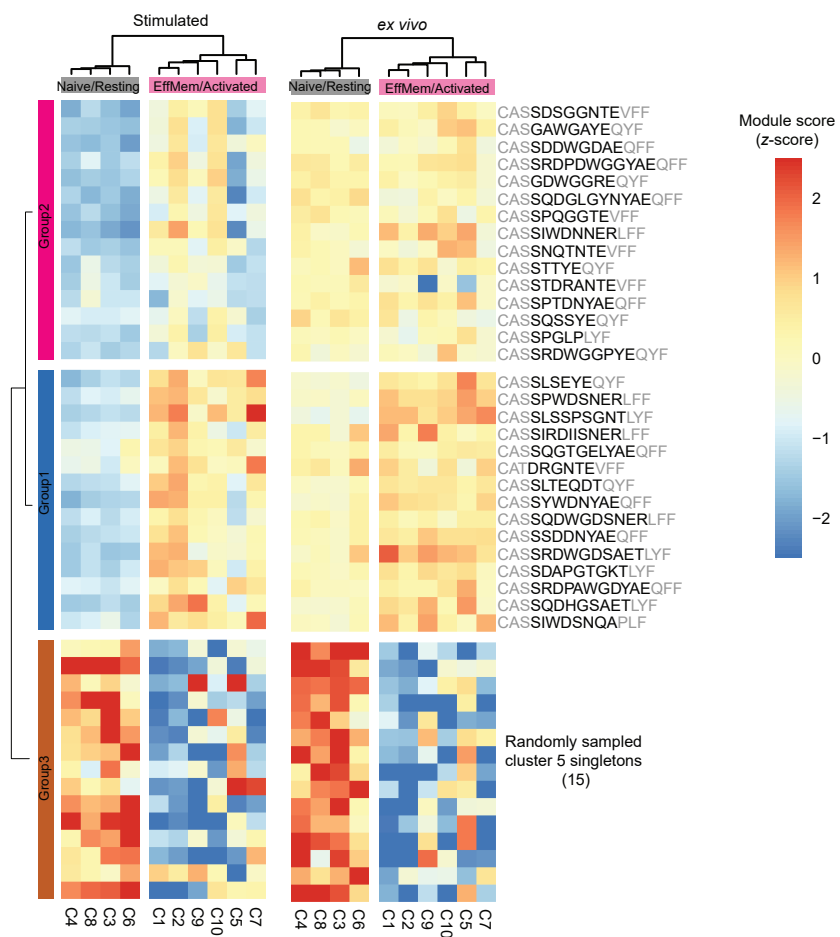

h

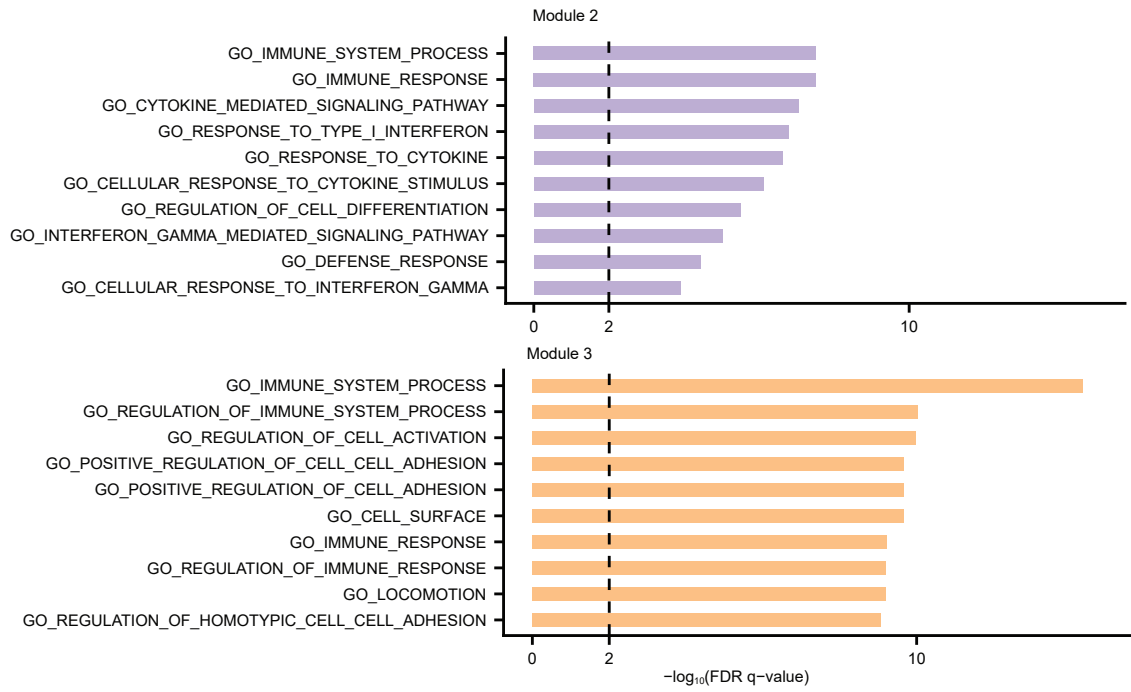

**Supplementary Fig. 3** | **a**, Gating strategy for flow cytometry sorting of E7-tetramer<sup>+</sup> CD8<sup>+</sup> T cells. **b**, Total *TCR* recovery across four HPV-E7 immunized mice (n = 4 animals). (left) Overall *CDR3* recovery rates for all cells. (right) *CDR3* recovery rates after removing cells without mapped *TCR* transcripts in whole transcriptome data. Box and whisker plots indicate the (box) 25<sup>th</sup> and 75<sup>th</sup> percentile along with (whisker) +/- 1.5\*interquartile range. **c**, Cumulative proportion of the top 20 most expanded TCR $\beta$  clonotypes in each animal and stimulation condition. **d**, Heatmap of genes most upregulated in each of the clusters shown in **Figure 3a**. **e**, tSNE visualization of single cells colored by the animal identity. **f**, Expression of canonical markers associated with naïve/CM, effector, and T cell activation/exhaustion phenotypes. Color indicates log-normalized gene expression (yellow to red). Color scales apply to each respective row separately. **g**, Average scores of CD8<sup>+</sup> T cell modules identified by *Singer, M. et al.*<sup>29</sup> (C1-10, labeled on bottom of heatmap) in Group 1, 2, and 3 clonotypes shown in **Figure 3d**. In *Singer, M. et al.*, C3, C4, C5, C6, C8 were upregulated in sorted naïve or *TIM3<sup>-</sup> PD1<sup>-</sup> CD8<sup>+</sup>* T cells (naïve/resting). C1, C2, C7, C9, C10 were upregulated in sorted effector/effector memory, *TIM3<sup>+</sup> PD1<sup>-</sup>*, or *TIM3<sup>+</sup> PD1<sup>+</sup> CD8<sup>+</sup>* T cells (Effmem/Activated). See *Singer, M. et al.* and **Supplementary Table 11** for more details. **h**, Gene Ontology (GO; C5) term enrichment of genes in Module 2 and 3. FDR q-values represent Benjamini and Hochberg-corrected hypergeometric *P* values. 49 and 35 genes are used from Module 2 and 3, respectively. See **Supplementary Table 12** for more details. Data represent combined data from four independent experiments of four mice total, with a total of 14,424 cells (**b-h**).

# Supplementary Figure 4

a

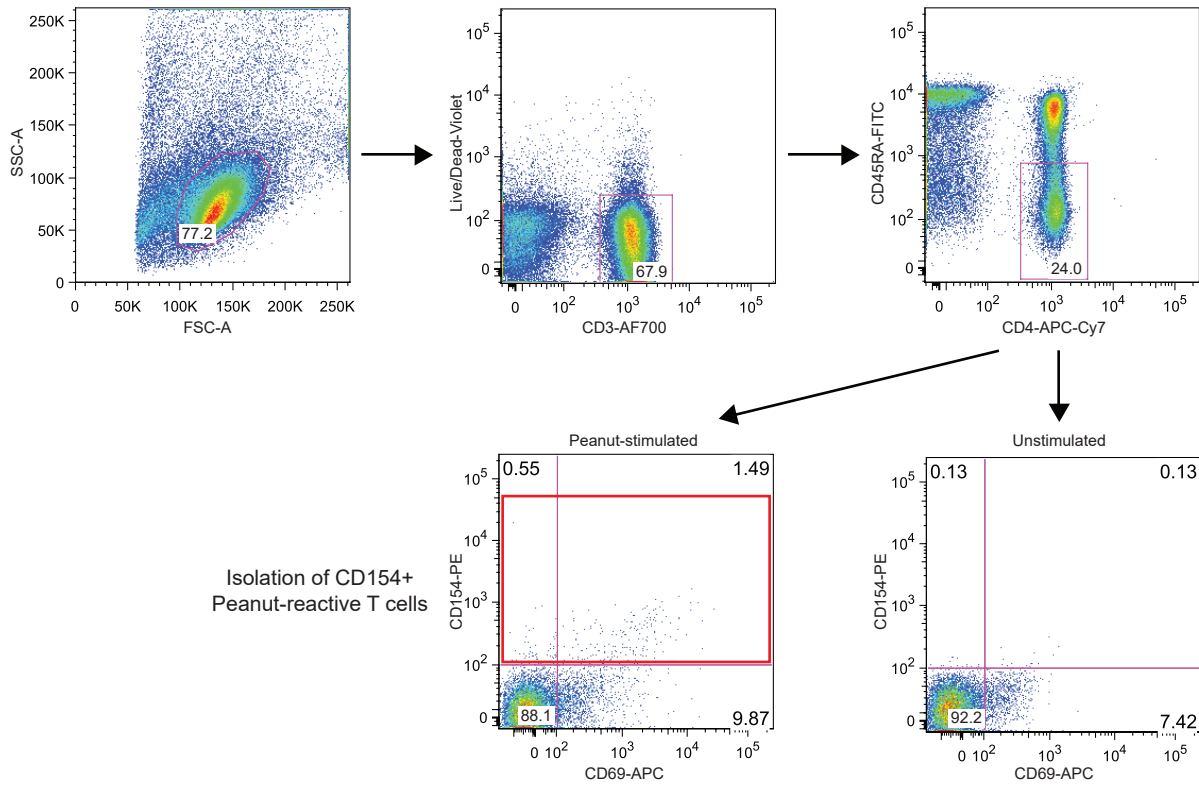

b

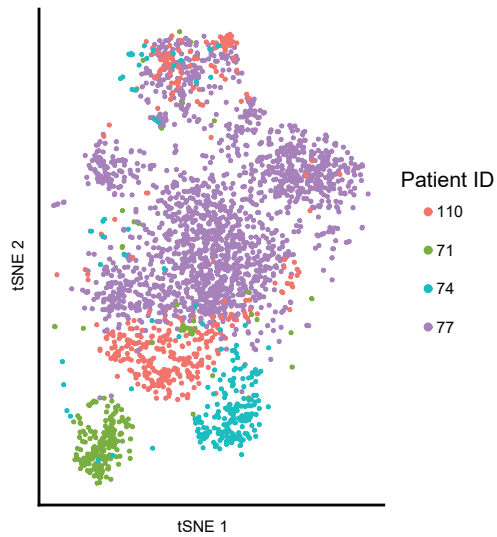

c

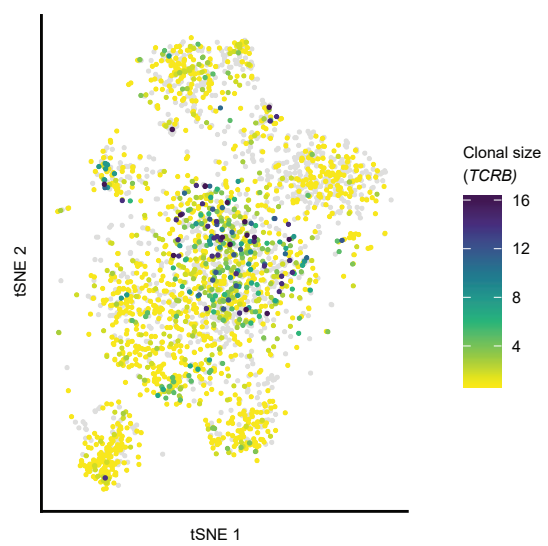

# Supplementary Figure 4

d

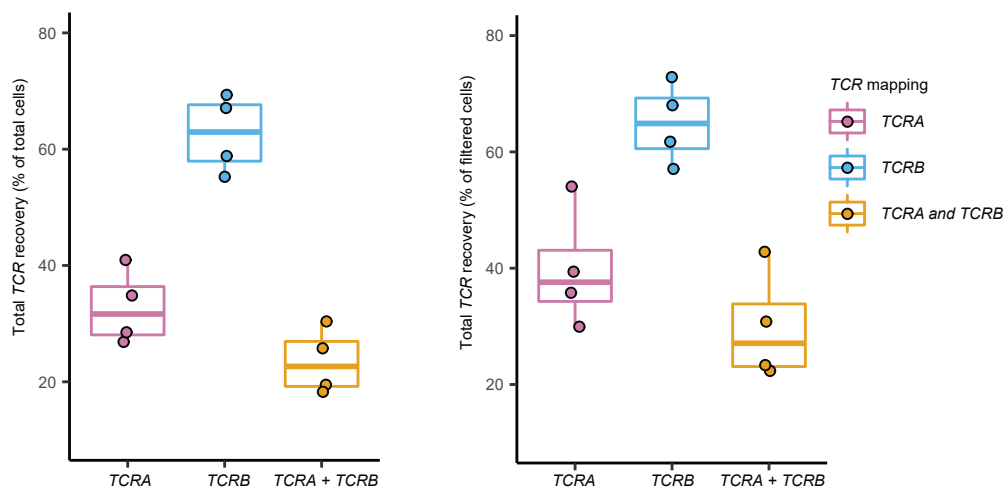

e

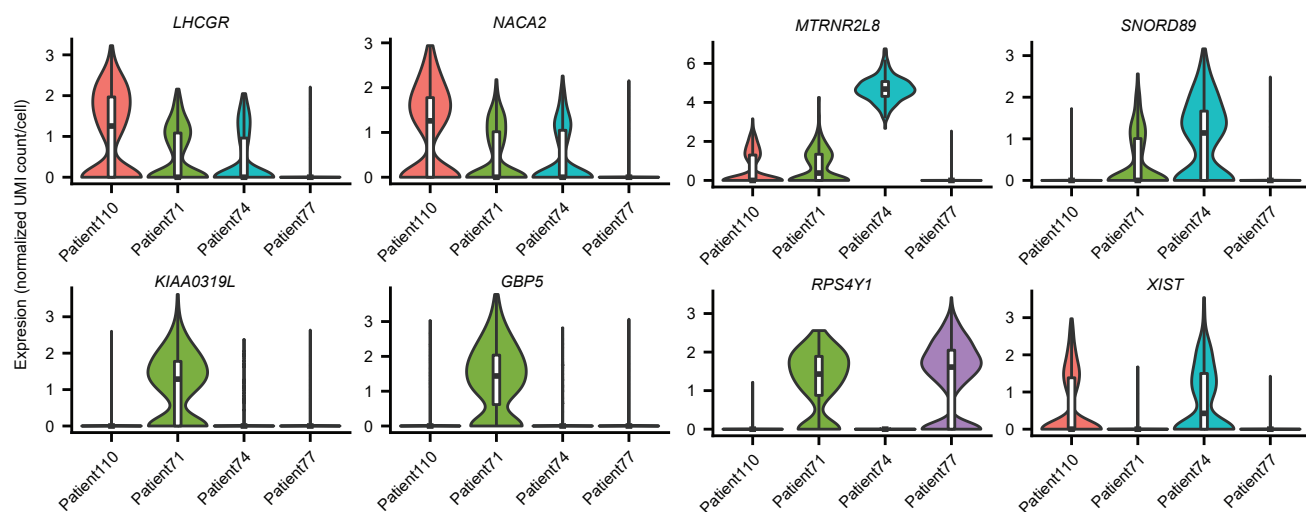

f

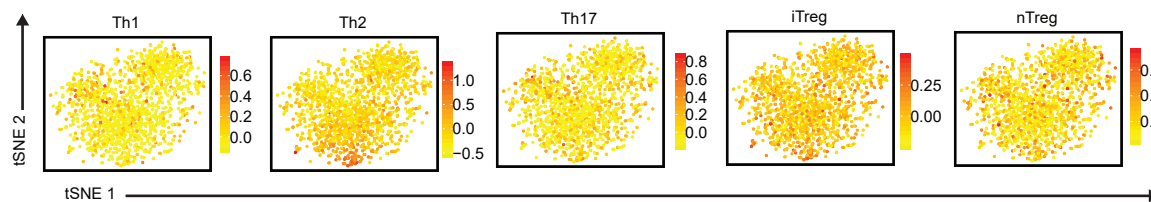



**Supplementary Fig. 4** | **a**, Gating strategy for flow cytometry sorting of CD154<sup>+</sup> CD4<sup>+</sup> T cells after *ex vivo* stimulation with peanut antigens. **b**, tSNE visualization of CD154<sup>+</sup> T cells from four peanut-allergic patients, colored by patient identity (n = 2,712 cells). **c**, Clonal size of TCR $\beta$  mapped on the tSNE visualization (n = 2,712 cells). **d**, (left) *CDR3* recovery rates of all cells, and (right) *CDR3* recovery rates after removing cells without mapped TCR transcript in the whole transcriptome data. **e**, Expression of selected genes that most differentiated the four patients. Violin plots represent estimated density of cells (n = 398 cells for Patient110; 246 cells for Patient71; 221 cells for Patient74; and 1847 cells for Patient 77). **f**, Module scores (yellow to red) of CD4 effector T cell signatures outlined by *Wei, G., et al.*<sup>38</sup> mapped on the tSNE visualization of cells from Patient 77 (n = 1847 cells). See **Supplementary Table 11** and **Methods** for more information. All box and whisker plots indicate the (box) 25<sup>th</sup> and 75<sup>th</sup> percentile along with (whisker) +/- 1.5\*interquartile range (**d,e**). Data represent combined data of four independent experiments with a total of four patients (**b-e**), or of an individual experiment with one patient (patient 77, **f**).

Supplementary Figure 5

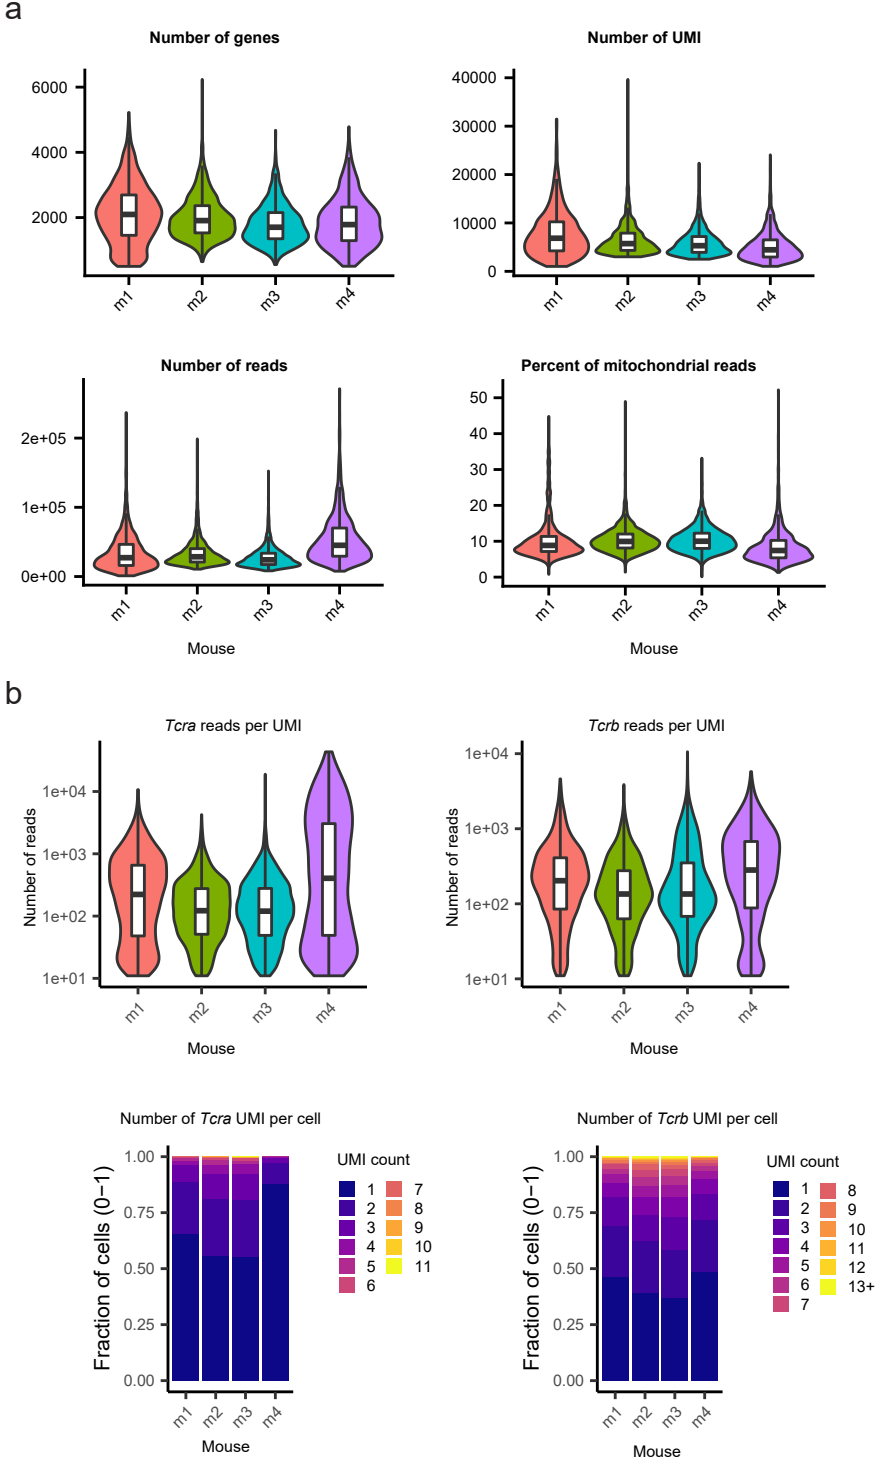

Supplementary Figure 5

C

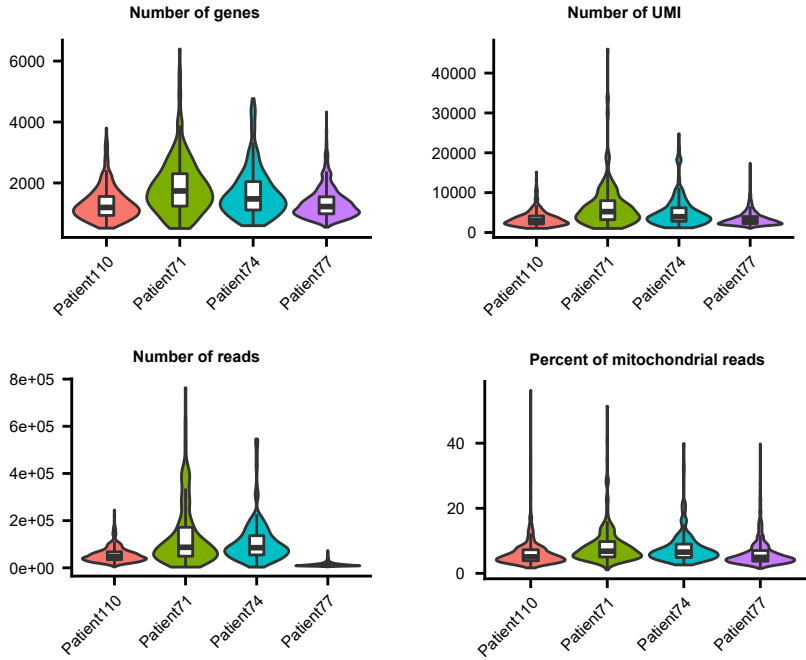

d

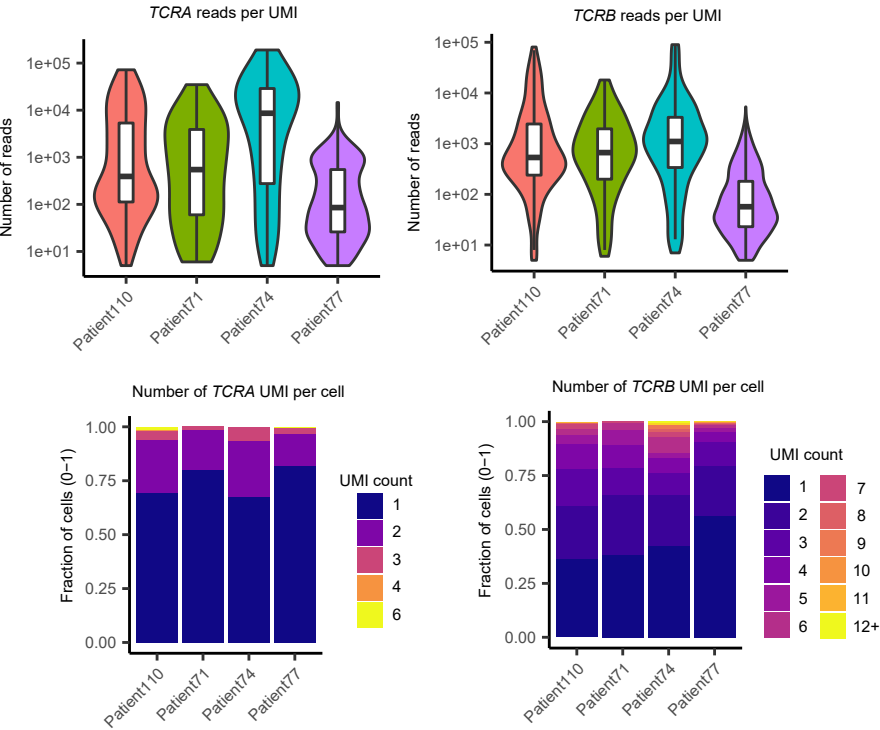

**Supplementary Fig. 5** | **a**, Number of genes, unique molecular identifiers (UMIs), sequencing reads, and percent of reads mapped to mitochondrial genes for each cell of the E7-tetramer<sup>+</sup> sorted T cell samples shown in **Figure 3** (n = 3231 cells for mouse 1; 3932 cells for mouse 2; 3937 cells for mouse 3; 3324 cells for mouse 3). **b**, (top) Per-UMI Read-depth of *Tcra* (n = 2164 UMIs for mouse 1; 4159 UMIs for mouse 2; 4141 UMIs for mouse 3; 847 UMIs for mouse 4) and *Tcrb* (n = 4453 UMIs for mouse 1; 7389 UMIs for mouse 2; 7986 UMIs for mouse 3; 4118 UMIs for mouse 4) as well as number of UMIs for each recovered *CDR3* in E7-tetramer<sup>+</sup> sorted T cell samples shown in **Figure 3** (n = 3231 cells for mouse 1; 3932 cells for mouse 2; 3937 cells for mouse 3; 3324 cells for mouse 3). **c**, Number of genes, UMIs, sequencing reads, and percent of reads mapped to mitochondrial genes for each cell (n = 398 cells for Patient 110; 246 cells for Patient 71; 221 cells for Patient 74; and 1847 cells for Patient 77) from the peanut allergic patients shown in **Figure 4**. **d**, (top) Per-UMI Read-depth of *TCRA* (n = 230 UMIs for Patient 110; 80 UMIs for Patient 71; 107 for Patient 74; 642 for Patient 77) and *TCRB* (n = 681 UMIs for Patient 110; 383 UMIs for Patient 71; 347 UMIs for Patient 74; 1884 UMIs for Patient 77). (bottom) number of UMIs for each recovered *CDR3* in T cells (n = 398 cells for Patient 110; 246 cells for Patient 71; 221 cells for Patient 74; and 1847 cells for Patient 77) from peanut allergic patients shown in **Figure 4**. All box and whisker plots indicate the (box) 25<sup>th</sup> and 75<sup>th</sup> percentile along with (whisker) +/- 1.5\*interquartile range (**a-d**). Violin plots represent estimated density of cells (**a-d**).

**Supplementary Table 1. Biotinylated oligonucleotide probes for TCR enrichment**

| Name         | Sequence                                                                                            | Vendor/Service                  |
|--------------|-----------------------------------------------------------------------------------------------------|---------------------------------|
| Human TRBC-1 | /5BiosG/GTGTTCACCCCRAGGTCGCTGTGTTTGTAGCCATCAGAAGCAGAGATCTCCACACCCAAAAGGCCACACTGGTGTGCCTGGCCACAGGC   | IDT Ultramer/Standard Desalting |
| Human TRAC-1 | /5BiosG/CTGTCTGCCTATTACCCGATTTTGTATTCTCAAACAATGTGTCAAAAGTAAGGATTCTGATGTGTATATCACAGACAAAACCTGTGCTAG  | IDT Ultramer/Standard Desalting |
| Mouse TRBC-1 | /5BIOSG/AGGATCTGAGAAATGTGACTCCACCCAAGGTCTCCTTGTGTTGAGCCATCAAAGCAGAGATTGCAAACAACAAAAGGCTACCCTCGTGT   | IDT Ultramer/Standard Desalting |
| Mouse TRAC-1 | /5BIOSG/ACATCCAGAACCCAGAACCTGCTGTGTACCAGTTAAAAGATCCTCGGTCTCAGGACAGCACCCCTCTGCCTGTTACCCGACTTTGACTCCC | IDT Ultramer/Standard Desalting |

**Supplementary Table 2. PCR primers**

| Name         | Sequence                                                             | Vendor/Service         |
|--------------|----------------------------------------------------------------------|------------------------|
| UPS          | AAGCAGTGGTATCAACGCAGAGT                                              | IDT/Standard Desalting |
| UPS-mod-N50x | AATGATACGGCGACCACCGAGATCTACACGCCTGTCCGCGGAAGCAGTGGTATCAACGCAGAGT*A*C | IDT/HPLC               |
| UPS2-N70x    | CAAGCAGAAGACGGCATAACGAGATGTCTCGTGGGCTCGG                             | IDT/HPLC               |

**Supplementary Table 4. Custom sequencing primers**

| Name                          | Sequence                                                 | Vendor/Service |
|-------------------------------|----------------------------------------------------------|----------------|
| Human Alpha Sequencing Primer | AGAGTCTCTCAGCTGGTACACGGCAGGGTCAGGITTCTGGATAT             | IDT/HPLC       |
| Human Beta Sequencing Primer  | CAAACACAGCGACCTCGGGTGGGAACACSTTKTTCAGGTCCT               | IDT/HPLC       |
| Mouse Alpha Sequencing Primer | GTCCTGAGACCGAGGATCTTTTAACTGGTACACAGCAGGTTCTGGGTTCTGGATGT | IDT/HPLC       |
| Mouse Beta Sequencing Primer  | TGCTTTTGATGGCTCAAACAAGGAGACCTGGGTGGAGTCACATTTCTCAGATCCT  | IDT/HPLC       |
| Seq-Well Sequencing Primer    | GCCTGTCCGCGGAAGCAGTGGTATCAACGCAGAGTAC                    | IDT/HPLC       |

**Supplementary Table 5. Repeatability statistics from OT-1 spiked-in samples technical duplicates**

| OT-1 Technical Duplicates      | Duplicate 1 | Duplicate 2 |
|--------------------------------|-------------|-------------|
| Total reads                    | 7,646,012   | 12,281,202  |
| % reads on-target              | 91.92       | 93.80       |
| number of cells w/ TCR call    | 4,452       | 4,511       |
| Jaccard index of overlap cells | 0.94        |             |
| number of UMI                  | 13,862      | 14,396      |
| Jaccard index of overlap UMI   | 0.84        |             |
| % identical clonotype call     | 99.74       |             |

**Supplementary Table 8. E7-tetramer sorted CD8+ T cells with dual functional TCR $\alpha$  transcripts**

| TRB_CDR3        | TRA_CDR3           | TRA.2_CDR3         | AnimalID | TRAV     | TRAJ   | TRBV  | TRBJ    | TRAV.2   | TRAJ.2 | #cells |
|-----------------|--------------------|--------------------|----------|----------|--------|-------|---------|----------|--------|--------|
| CASSQDLGNYAEQFF | CAMREGLMATGGNNKLTf | CAMREGLMATGGNNKLTf | m2       | TRAV16D  | TRAJ56 | TRBV2 | TRBJ2-1 | TRAV16N  | TRAJ56 | 1      |
| CASSQDLGNYAEQFF | CAMREGLMATGGNNKLTf | CAMREGLMATGGNNKLTf | m2       | TRAV16N  | TRAJ56 | TRBV2 | TRBJ2-1 | TRAV16D  | TRAJ56 | 2      |
| CASSQDLGNYAEQFF | CAMREGLMATGGNNKLTf | CAVSNSGGGSNYKLTf   | m1       | TRAV16D  | TRAJ56 | TRBV2 | TRBJ2-1 | TRAV7D-5 | TRAJ53 | 2      |
| CASSQDLGNYAEQFF | CAMREGLMATGGNNKLTf | CAVSNSGGGSNYKLTf   | m2       | TRAV16D  | TRAJ56 | TRBV2 | TRBJ2-1 | TRAV7D-5 | TRAJ53 | 143    |
| CASSQDLGNYAEQFF | CAMREGLMATGGNNKLTf | CAVSNSGGGSNYKLTf   | m3       | TRAV16D  | TRAJ56 | TRBV2 | TRBJ2-1 | TRAV7D-5 | TRAJ53 | 11     |
| CASSQDLGNYAEQFF | CAVSNSGGGSNYKLTf   | CAMREGLMATGGNNKLTf | m2       | TRAV7D-5 | TRAJ53 | TRBV2 | TRBJ2-1 | TRAV16D  | TRAJ56 | 60     |
| CASSQDLGNYAEQFF | CAVSNSGGGSNYKLTf   | CAMREGLMATGGNNKLTf | m3       | TRAV7D-5 | TRAJ53 | TRBV2 | TRBJ2-1 | TRAV16D  | TRAJ56 | 6      |

**Supplementary Table 9. Peanut allergy subject information**

| Patient ID | Age | Gender | Skin prick test wheal (mm) | Peanut-specific IgE (kU/L) | Ara h 2-specific IgE (kU/L) | Total IgE (kU/L) |
|------------|-----|--------|----------------------------|----------------------------|-----------------------------|------------------|
| 110        | 10  | Female | 6                          | 247                        | 168                         | 1437             |
| 71         | 13  | Male   | 4                          | 6.34                       | 1.26                        | 516              |
| 74         | 14  | Female | 8                          | 4.65                       | 1.39                        | 249              |
| 77         | 17  | Male   | 13                         | 240                        | 74.5                        | 1595             |
